# Supplementary material for: Suppression of polyglutamine protein toxicity by co-expression of a heat-shock protein 40 and a heat-shock protein 110
Source: PubMed Central journal article supplement — Cell Death Dis. 2013 Oct 3;4(10):e833–. doi: 10.1038/cddis.2013.351 (PMC3824661; doi:10.1038/cddis.2013.351), 2013-10-03
Supplement: cddis2013351x1.pdf [file cddis2013351x1.pdf]

# Supplemental Figure S1

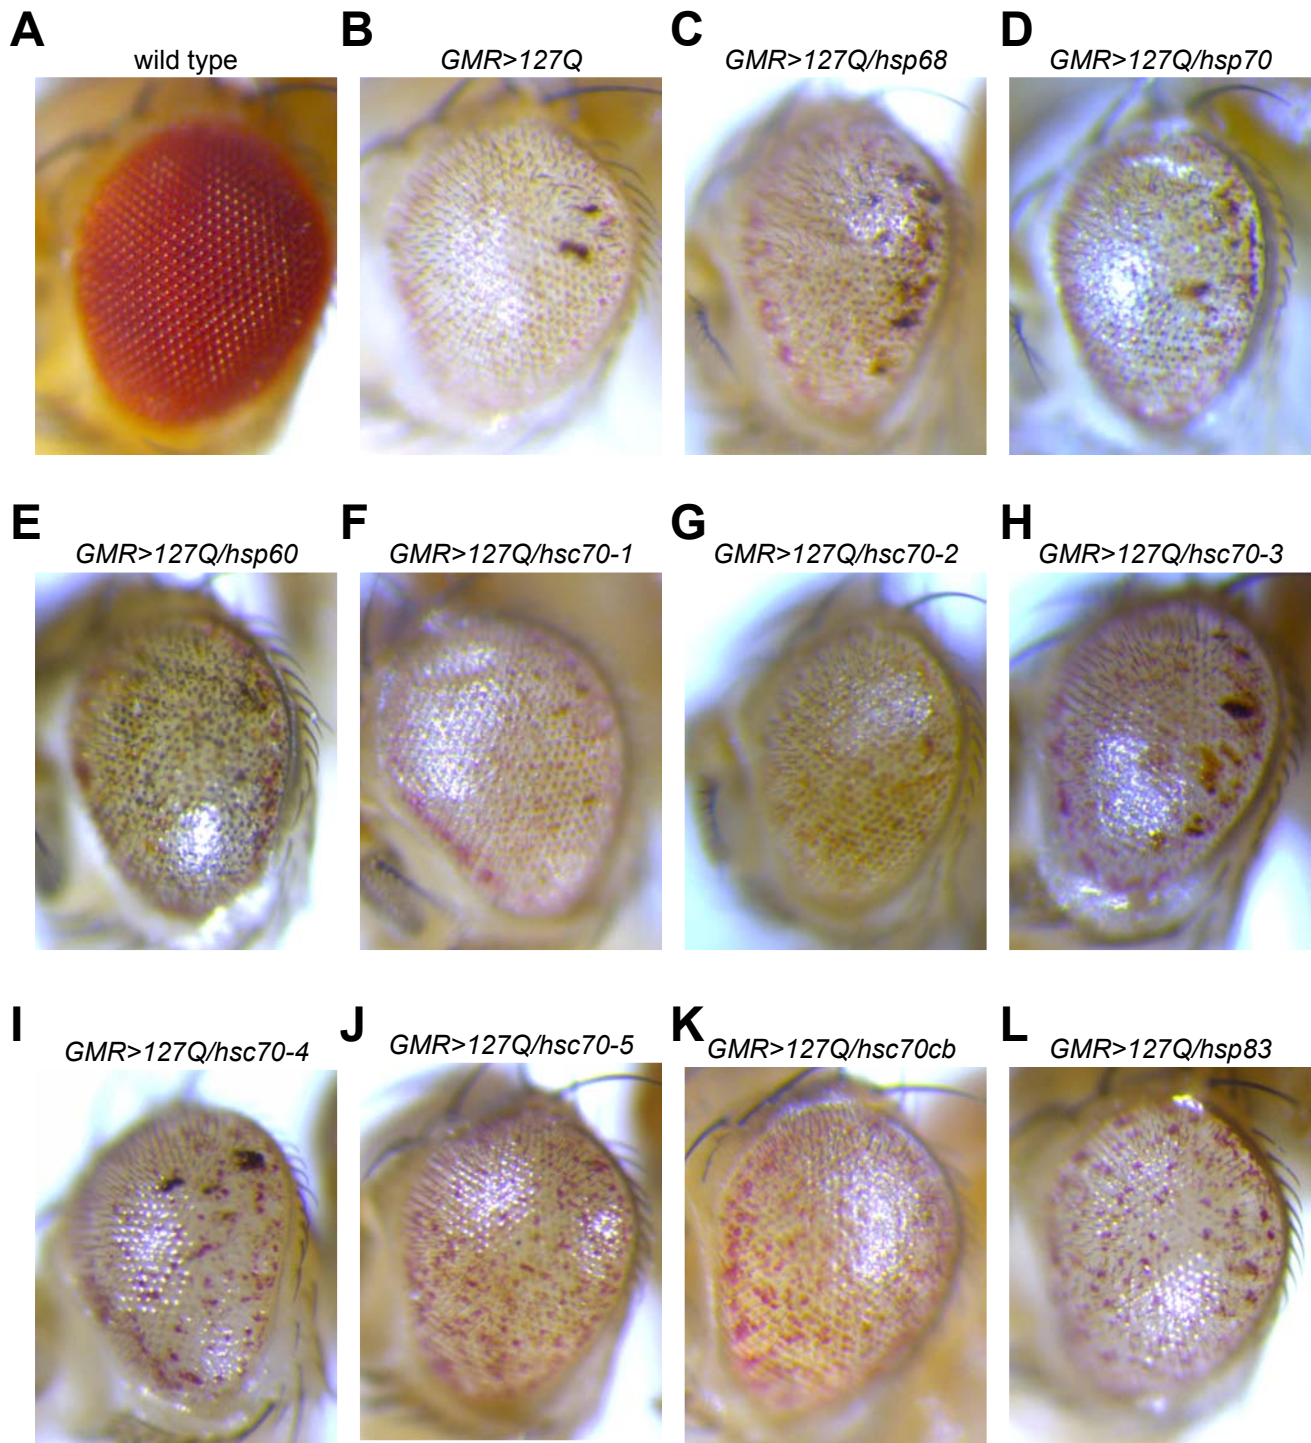

**Supplemental Fig S1.** Screen heat-shock proteins for suppressors of polyQ toxicity. Individual expression of HSP68, HSP70, HSP60, HSC70-1, HSC70-2, HSC70-3, HSC70-4, HSC70-5, HSC70cb, HSP83 in the *GMR>127Q* background had little effect on external degeneration of *GMR>127Q*.

## Supplemental Figure 2

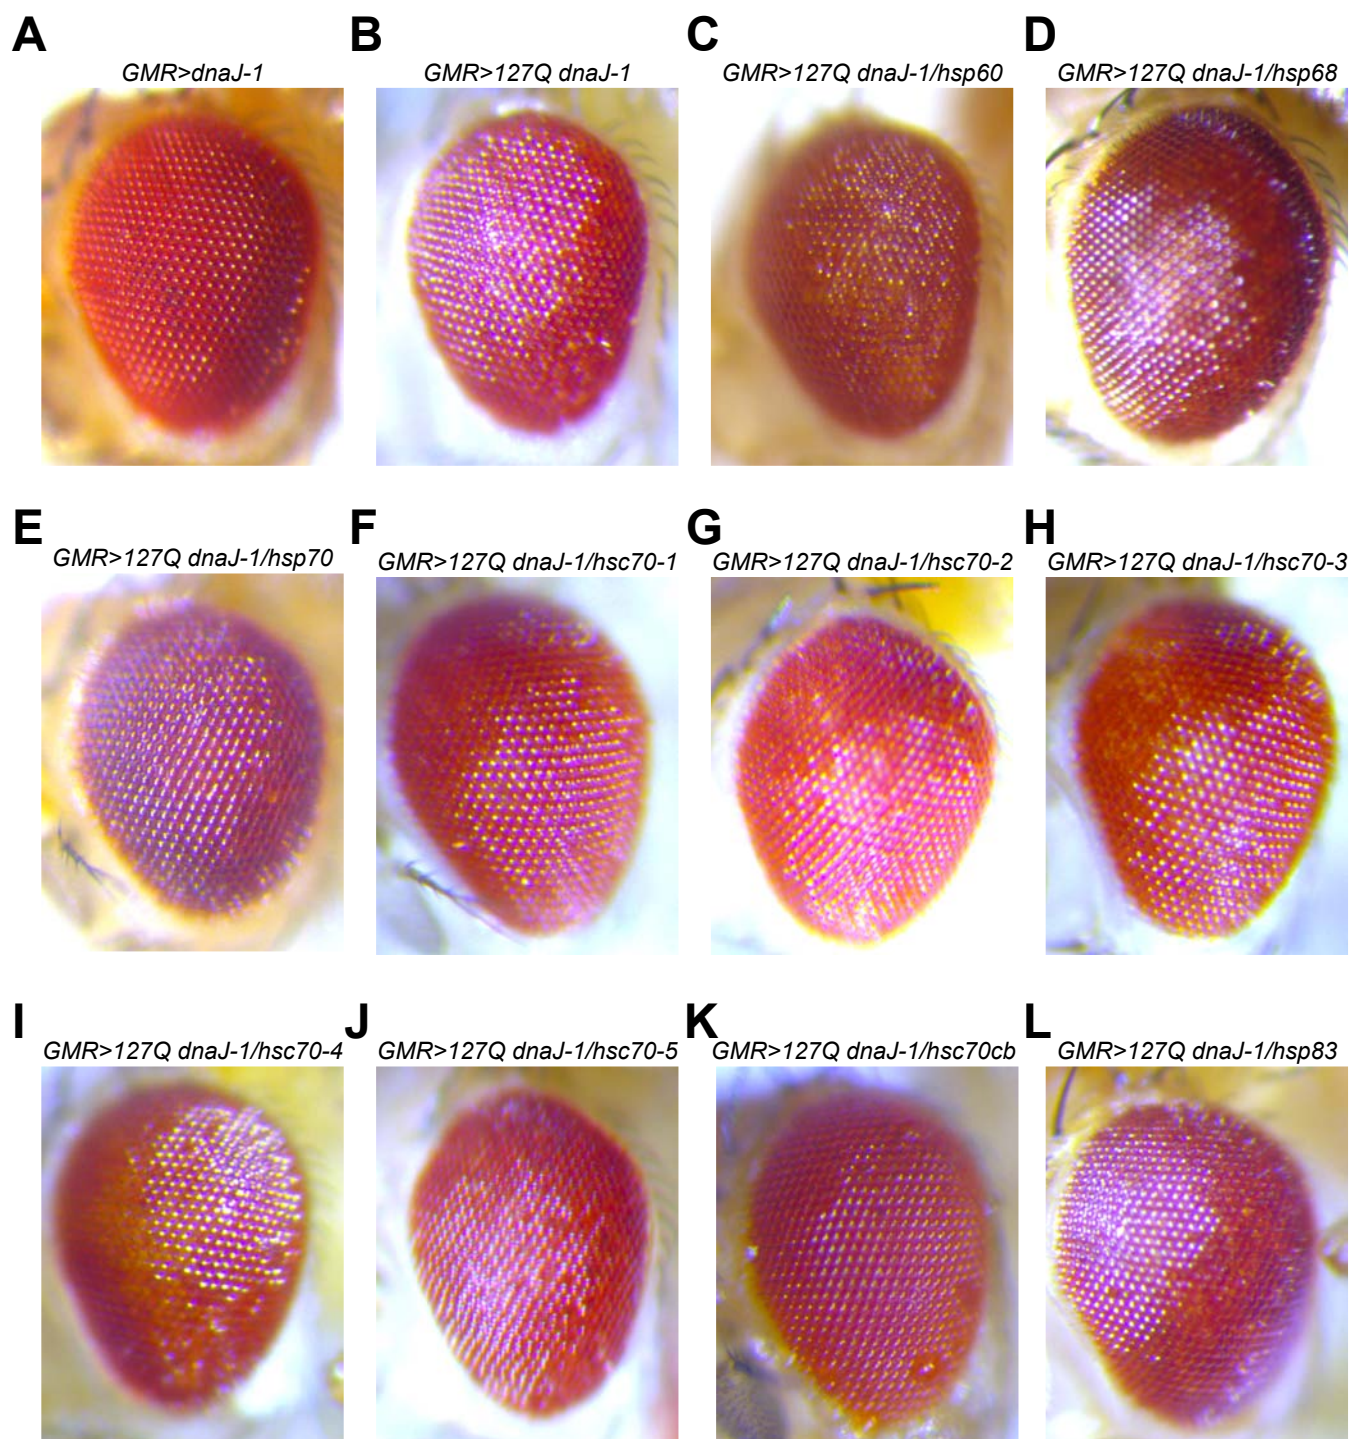

**Supplemental Fig. S2.** Screen heat-shock proteins for co-suppressors with DNAJ-1 on polyQ toxicity. Comparing to *GMR>127Q dnaJ-1*, expression of HSP68, HSP70, HSP60, HSC70-1, HSC70-2, HSC70-3, HSC70-4, HSC70-5, HSP83 with DNAJ-1 in the *GMR>127Q* background had little effect on external degeneration, while expression of HSC70cb (K) enhance the suppression effect of DNAJ-1 on 127Q-induced external degeneration. Flies under 1-day old were used.

# Supplemental Figure 3

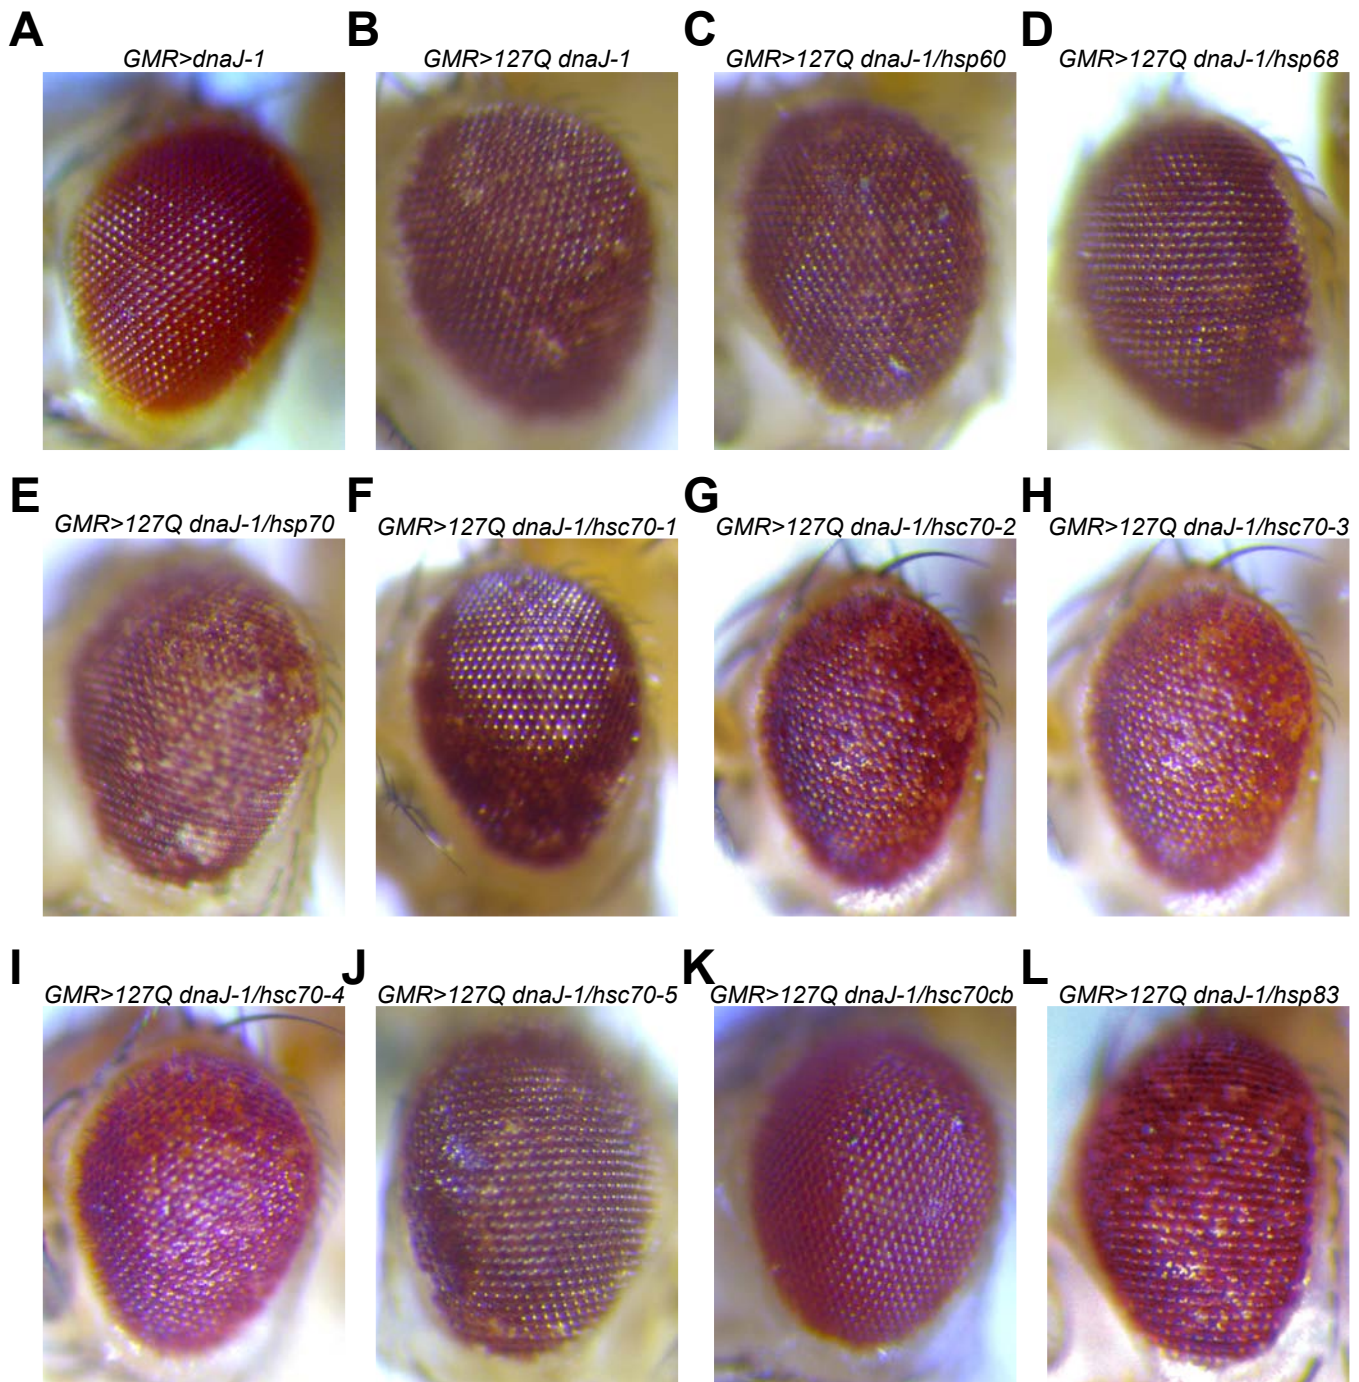

**Supplemental Fig. S3.** Examination of eye morphology of aged animals with co-expression of DNAJ-1 on polyQ-induced external degeneration. Co-expression of HSC70cb (K) with DNAJ-1 further suppressed external degeneration of *GMR>127Q* compared with *GMR>127Q dnaJ-1*, while co-expression of other heat-shock proteins with DNAJ-1 did not. The flies were reared under a 12 h light/12 h dark cycle for 10 days.

## Supplemental Figure S4

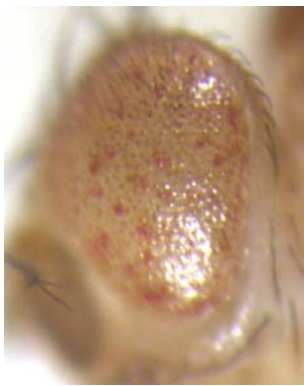

*GMR>127Q*

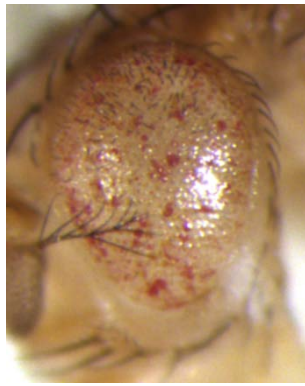

*GMR>127Q droJ2*

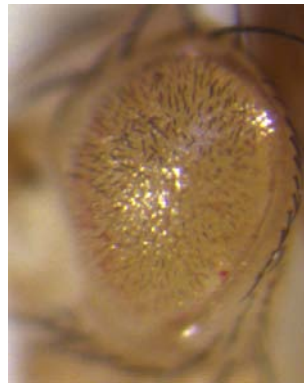

*GMR>127Q CG5001*

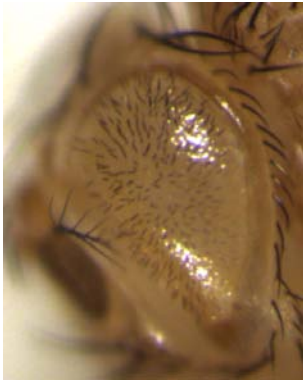

*GMR>127Q CG2887*

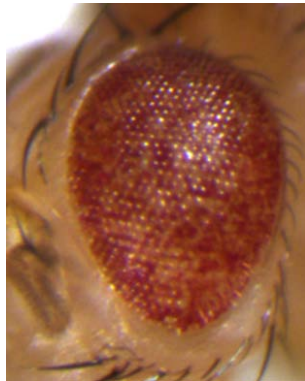

*GMR>127Q mrj*

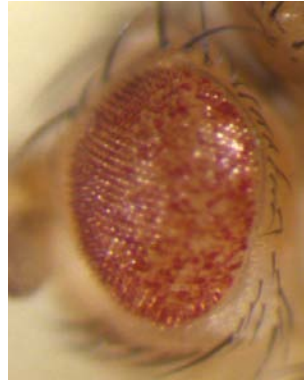

*GMR>127Q mrj/hsc70-cb*

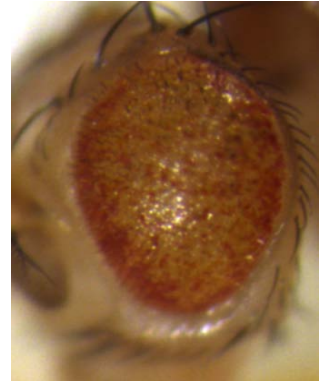

*GMR>127Q mrj/hsc70-cbRi*

Supplemental Figure S4: MRJ suppressed polyQ toxicity independent of HSC70cb. Photographs of the external eye of *GMR>127Q(GMR-Gal4 UAS-127Q/+)*, *GMR>127Q droJ2(GMR-Gal4 UAS-127Q/UAS-droJ2)*, *GMR>127Q CG5001(GMR-Gal4 UAS-127Q/UAS-CG5001)*, *GMR>127Q CG2887(GMR-Gal4 UAS-127Q/UAS-CG2887)*, *GMR>127Q mrj(GMR-Gal4 UAS-127Q/UAS-mrj)*, *GMR>127Q mrj/hsc70-cb (GMR-Gal4 UAS-127Q UAS-hsc70cb/UAS-mrj)* and *GMR>127Q mrj/hsc70-cbRi (GMR-Gal4 UAS-127Q UAS-hsc70cbRi/UAS-mrj)*.

## Supplemental Figure S5

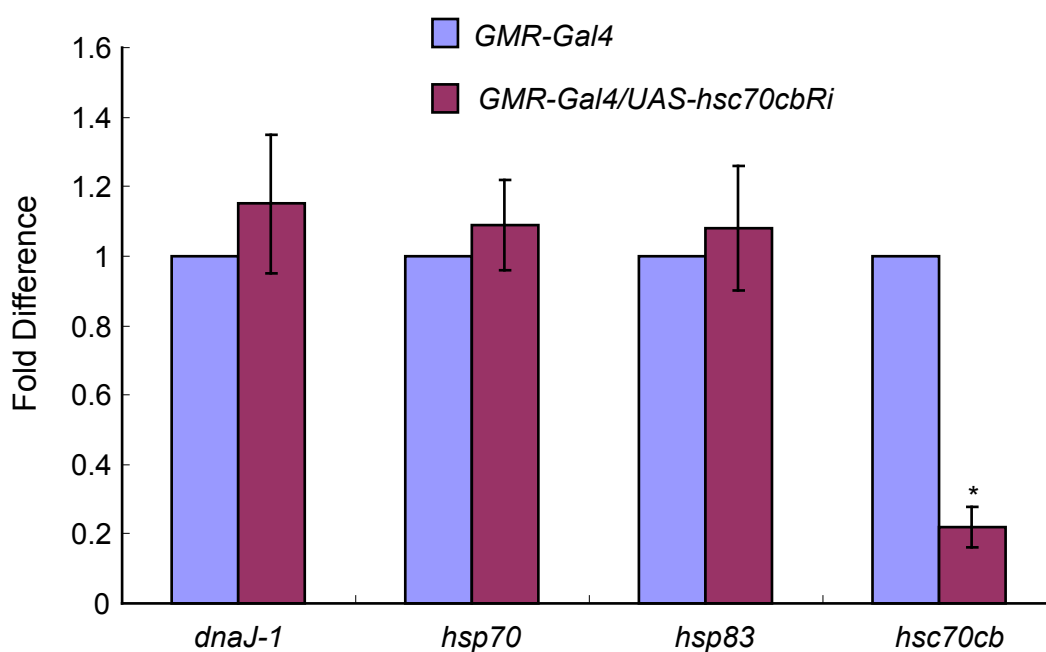

Supplemental Figure S5: Specific Downregulation of *hsc70cb* mRNA by expression of *hsc70cb* RNAi in fly retina. Fly retinæ were dissected from young flies of *GMR-gal4* and *GMR-gal4/hsc70cbRi*. Quantitative RT-PCR analysis of the expression of *dnaJ-1*, *hsp70*, *hsc83* and *hsc70cb* was normalized to *gapdh*. Asterisks indicate statistically significant differences (Student's unpaired t test;  $P < 0.01$ ).

|         |                                                                                              |     |
|---------|----------------------------------------------------------------------------------------------|-----|
| HSP105  | MSVVGIDVGSQSCYIAVARAGGIETIANEFSDRCTPSVIFSGSKNRTIGVAAKNQQTTHANNVSNFKRFHGRAFNDFEIQKEKENLSYD    | 90  |
| APG-1   | MSVVGIDLGFLNCYIAVARSGGIETIANEYSDRCTPACISLGSRTAIGNAAKSOIVTVNVRNTIHGFKKLHGRSFDPIVQTERIRLPYE    | 90  |
| HSC70cb | MSVIGIDFGNESCYIAARSGETIETLANDYSLRATPSFVAFDGKKRIIGVAAKNQOVNMMKNTVGGFKRLGRKFNDPEVQHELTSIPAR    | 90  |
| HSP105  | LVPLKNGGVGIKVMYMGEEHLFSVEQITAMLLTKLKETIENSLLKPPVTDVCVISVPSFFTDAERRSVLDAAQIVGLNCLRLMNDMTAVALN | 180 |
| APG-1   | LQKMPNGSAGVKVRYLEEFERFFAIEQVTGMLLAKLKETSENALKKPVADCVISVPSFFTDAERRSVMAAAQVAGLNCLRLMNETTAVALA  | 180 |
| HSC70cb | VEARGDGSIGIKVNYLGEIQHFGPEQLTAMLFTKLKETSAAMQOTQVNDCVIACVFFFTNAERKALLDAAQIAGLNVLRLMNETTATALA   | 180 |
| HSP105  | YGIYKQDLPSLDEKPRIVFVDMGHSAFQVSACAFNKGKLVLTAFDPELGGKNFDEKLVDFHCAEFKTKYKLDKSKTRALLRLRYQEC      | 270 |
| APG-1   | YGIYKQDLPLDEKPRNVVFTDMGHSAYQVSVCAFNKGKLVLTAFDPELGGKRFDEALVDYFCDFKTKYKINVKENSRALLRLRYQEC      | 270 |
| HSC70cb | YGFYKNDL--FEDKPRNVIFVDFGHSSLQASACAFNKGKLVLTAFDPELGGKRFDEALVDYFCDFKTKYKINVKENSRALLRLRYQEC     | 267 |
| HSP105  | EKLKMLSSNSTDLPLNIECFMNDKDVSGKMNRSQFEELCAELLQKIEVPLYSLLQTHIKVEDVSAVEIVGGATRIPAVKERIAKFFGK     | 360 |
| APG-1   | EKLKMLSANASDLPLNIECFMNDLDVSSKMNRQFEELCASLLARVEPPLKAVMEQANLQREDISSIEIVGGATRIPAVKEQITKFFLK     | 360 |
| HSC70cb | EKLKQMSANSTKPLNIECFIDIDVSSSMORSQFEELCAPVLQORVEQTFKRLIAESKQLQDDIHSVEIVGGSRIKSVKQLIEQVFNK      | 357 |
| HSP105  | DI STTLNADEAVARGCALQCAILSPAFAKVFREFSVTDVAPFPIISLIWNHDS EDTGVHEVSRNHAAPFSKVLTFDRGPFLEAFYSDPQ  | 450 |
| APG-1   | DI STTLNADEAVARGCALQCAILSPAFAKVFREFSITDLVPYSITLRWKTSEFEGSGECEVFCNHPAPFSKVIITFKKPEPFEAFYTNLH  | 450 |
| HSC70cb | PASTTLNQDEAVSRGALQCAI MSPAVRVREFGVTDIQNYAVKVLWDSEGSAAFGETIEIPQYHASPFSRLLTINRKGPFNVISIVYG--Q  | 445 |
| HSP105  | GVPYPEAKIGREVVQNSAQKDGKSRVVKVVRVNTHGIFITISTASMVEKVPTEENEMSSHADMECLNQRBPENEDTDKNVQQDNSEAGT    | 540 |
| APG-1   | EVPYPDARIGSEFTIQNVEPQSDGDSKVKVVRVNTHGIFSVASASVIEKQNLGD--HSDAPMETETSFKNENKDNMDKMQVDQEEG--     | 536 |
| HSC70cb | QVPYPDQTIQVTKVQKVEETERGEGQDVKLVKRVINNGIVLISSATLVEKKEAEEA--AAAAEQAASEEKFGDQINNTGEPADGQEEG--   | 531 |
| HSP105  | QPQVQIDAQQTSSQSPSEPEITSEENKIPDADKANEEKVDQPPPEAKPKIKVNVNVELPIEANLVWQLGKDLLNMYTETEGKMIMQDKLEKE | 630 |
| APG-1   | --HQKCHAHT----EEEEIDHTGAKTKSAVSDKQDRINQILKKGK----VKSIDLPIQSSLCRQLGQDLLNSYIENEGKMIMQDKLEKE    | 616 |
| HSC70cb | -----ADKKKAS-----KATELPLECTHGFSPVDLSN-YTQQESKMIENDQKETE                                      | 577 |
| HSP105  | RNDAKNAVEEYVYFRDKLGG--PYEKFICEQDHQNFIRLLTETEDWLYEEGEDQAKQAVVDKLEELMKIGTPVKVRECEAEERPKMFEEL   | 719 |
| APG-1   | RNDAKNAVEEYVYDFRDLGT--VYEFITPEDLSKISAVLEDTENWLYEDGEDQPKQVYVDKLEELMKYQPIQMKYMEHEERPKALNDL     | 705 |
| HSC70cb | RIDAKNALEEYVYDMRNLQGGPFERYVVEAEREKIVSCLNDLENWLYEDGEDCEEDITYSRLQALHQKTDPIKIRASLYEQGPAAFDEL    | 667 |
| HSP105  | GQRLOHYAKTAAAFRNKDEKYNHIDSEMKKVEKSVNVEWMMNVMNAQAKKSLDQDPVVRAQEIKTIKIKELNNTCEPVVITQPKPKIES    | 809 |
| APG-1   | GKHIQLVMKVI EAVRNKDERYDHLDPTEMEKVEKCTSDAMSWLNSKMNAQNKLSLTQDPVVKVSEIVAKSKELDNECNPIIYKPKPKAEV  | 795 |
| HSC70cb | KNSIATARLAAEFKRGVVKYDHLTETEFINISEADKACSWLDANLPKFTQSPRTADSPVQISAVRQEVQTLNSCVSSVINRAKPK-PI     | 756 |
| HSP105  | EKLERTPNGPNI DKKEEDLEDKNFGAEPHONGECYPNEKNSVNMDDL                                             | 858 |
| APG-1   | E-----EDKPRANSERNGPMDGQSGTETKSDSTKISSQHTKSSGEMEVD                                            | 839 |
| HSC70cb | BAKTATPPKDEANAEQNGGEPAN--SGDKMDVDNNGQSAAGNDPSMEVE                                            | 804 |

**Supplemental Fig. S6.** Alignment of the HSC70cb amino acid sequence with HSP105 and APG-1. Identical residues, which are found in at least two proteins, are enclosed in black boxes. The ATPase domain is indicated by the solid line underneath the corresponding sequence. The running tally of amino acids is indicated to the right, and asterisk indicates the amino acid in HSC70cb mutated to HSC70cb<sup>K68S</sup>.
